# Supplementary material
Source: Springer Nature journal article supplement (https://www.springermedizin.de/resource/supplementary/12974_2013_980_MOESM5_ESM.pdf/9600566)

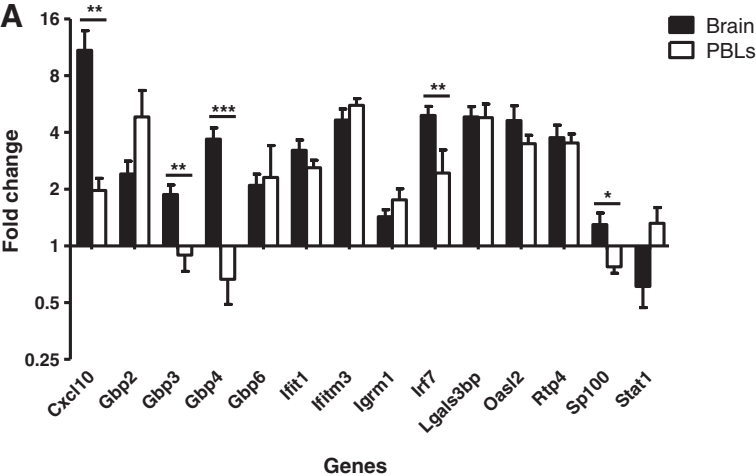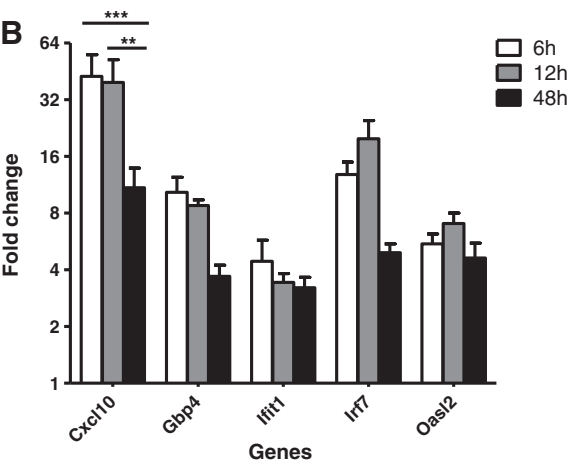

Supplement: MOESM5 [file 9600566]
